# Supplementary material for: Synergistic immunotherapy of glioblastoma by dual targeting of IL-6 and CD40
Source: PubMed Central journal article supplement (PMC8187342; doi:10.1038/s41467-021-23832-3), 2021-06-08
Supplement: 41467_2021_23832_MOESM1_ESM.pdf [file 41467_2021_23832_MOESM1_ESM.pdf]

## Supplementary Information for

### Synergistic immunotherapy of glioblastoma by dual targeting of IL-6 and CD40

Fan Yang<sup>1,#</sup>, Zhenqiang He<sup>1,#</sup>, Hao Duan<sup>1,#</sup>, Duo Zhang<sup>1</sup>, Juehui Li<sup>1</sup>, Huijuan Yang<sup>1</sup>, Jay F. Dorsey<sup>1</sup>, Wei Zou<sup>1</sup>, S. Ali Nabavizadeh<sup>2</sup>, Stephen J. Bagley<sup>3</sup>, Kalil Abdullah<sup>4</sup>, Steven Brem<sup>3,4</sup>, Lin Zhang<sup>5</sup>, Xiaowei Xu<sup>6</sup>, Katelyn T. Byrne<sup>3</sup>, Robert H. Vonderheide<sup>3,7,\*</sup>, Yanqing Gong<sup>8,\*</sup>, & Yi Fan<sup>1,3,4,7,\*</sup>

<sup>1</sup>Department of Radiation Oncology, University of Pennsylvania, Philadelphia, PA, USA

<sup>2</sup>Department of Radiology, University of Pennsylvania, Philadelphia, PA, USA

<sup>3</sup>Abramson Cancer Center, University of Pennsylvania, Philadelphia, PA, USA

<sup>4</sup>Department of Neurosurgery, University of Pennsylvania, Philadelphia, PA, USA

<sup>5</sup>Department of Obstetrics and Gynecology, University of Pennsylvania, Philadelphia, PA, USA

<sup>6</sup>Department of Pathology and Laboratory Medicine, University of Pennsylvania, Philadelphia, PA, USA

<sup>7</sup>Institute for Immunology, University of Pennsylvania, Philadelphia, PA, USA

<sup>8</sup>Division of Human Genetics and Translational Medicine, Department of Medicine, University of Pennsylvania, Philadelphia, PA, USA

#These authors contributed equally

\*Correspondence to: rhv@upenn.edu; gongy@penncmedicine.upenn.edu; yi.fan@penncmedicine.upenn.edu

**a**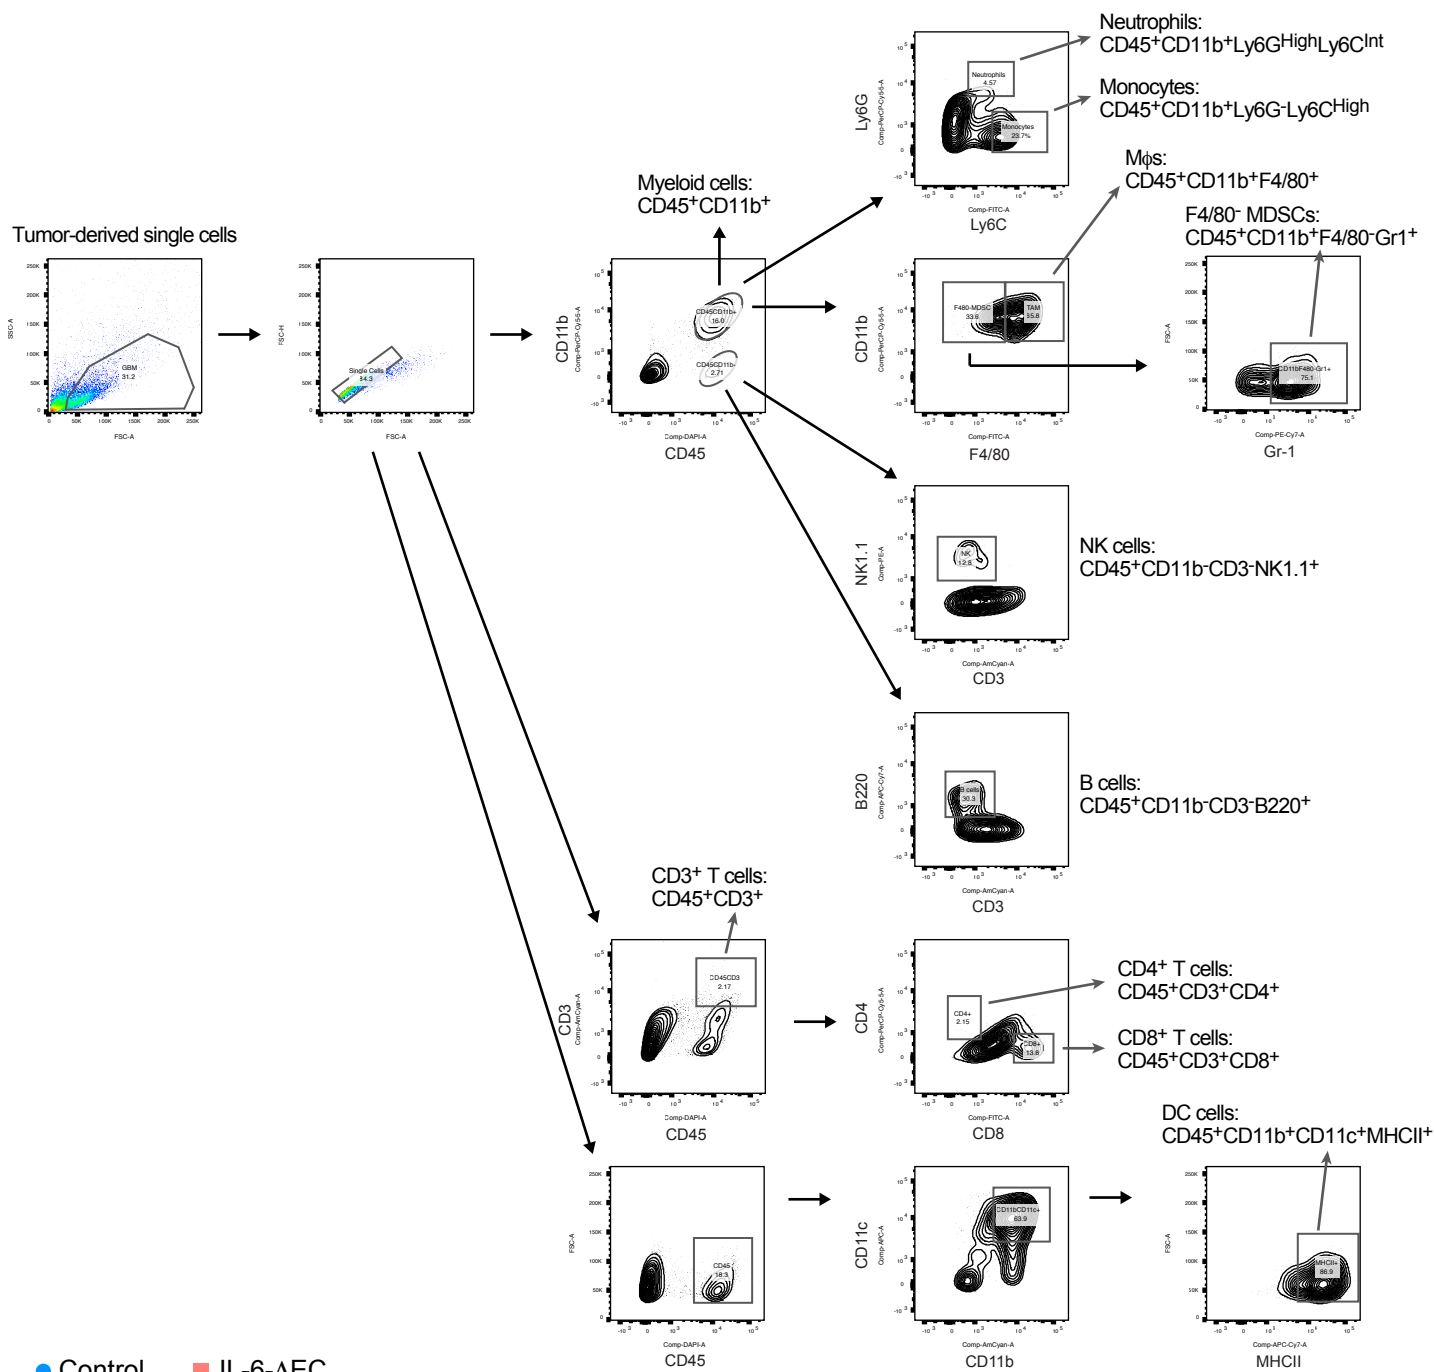**b**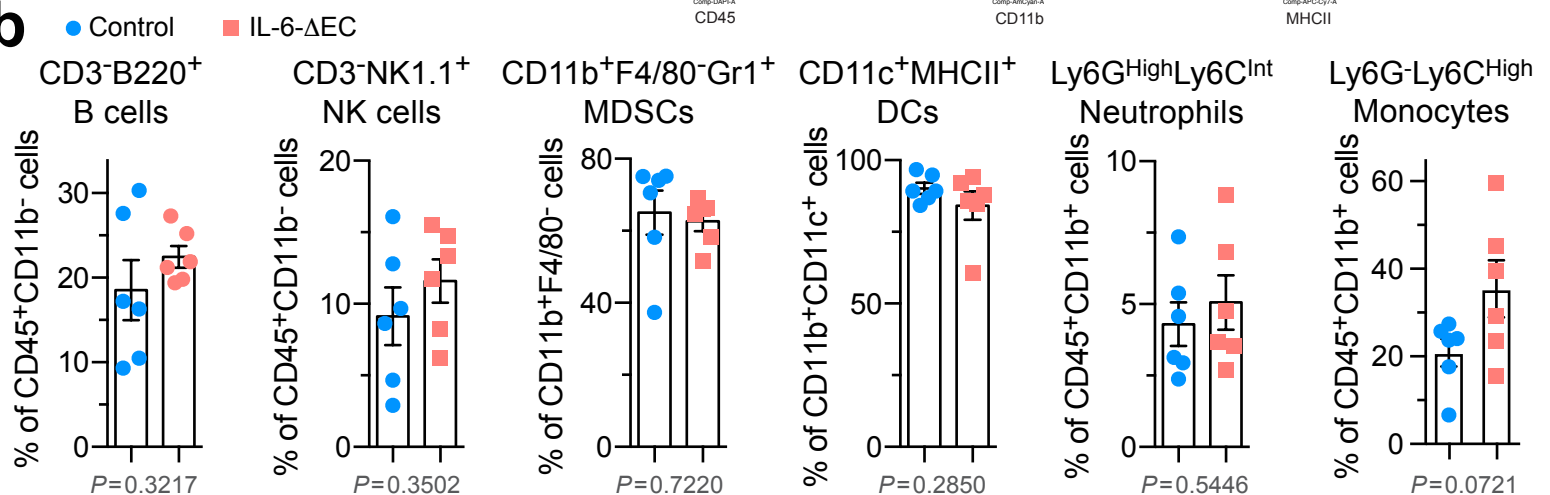

### Supplementary Fig. 1. Effects of genetic ablation of IL-6 on GBM immunity.

GBM was induced by RCAS-mediated genetic engineering, followed by orthotopic tumor implantation into *Cdh5-Cre<sup>ERT2</sup>;/Il6<sup>fl/fl</sup>* recipient mice that were pre-treated with (IL-6-ΔEC) or without (Control) tamoxifen. Two weeks after tumor implantation, tumors were excised. Tumor-derived single cell suspensions were analyzed by flow cytometry. **a**, Sorting strategies used for the assays presented in this figure and Fig.1d-f. **b**, Analysis for different immune cells (n = 6 mice, mean ± SEM). Statistical analysis by two-tailed Student's *t* test. Source data are provided as a Source data file.

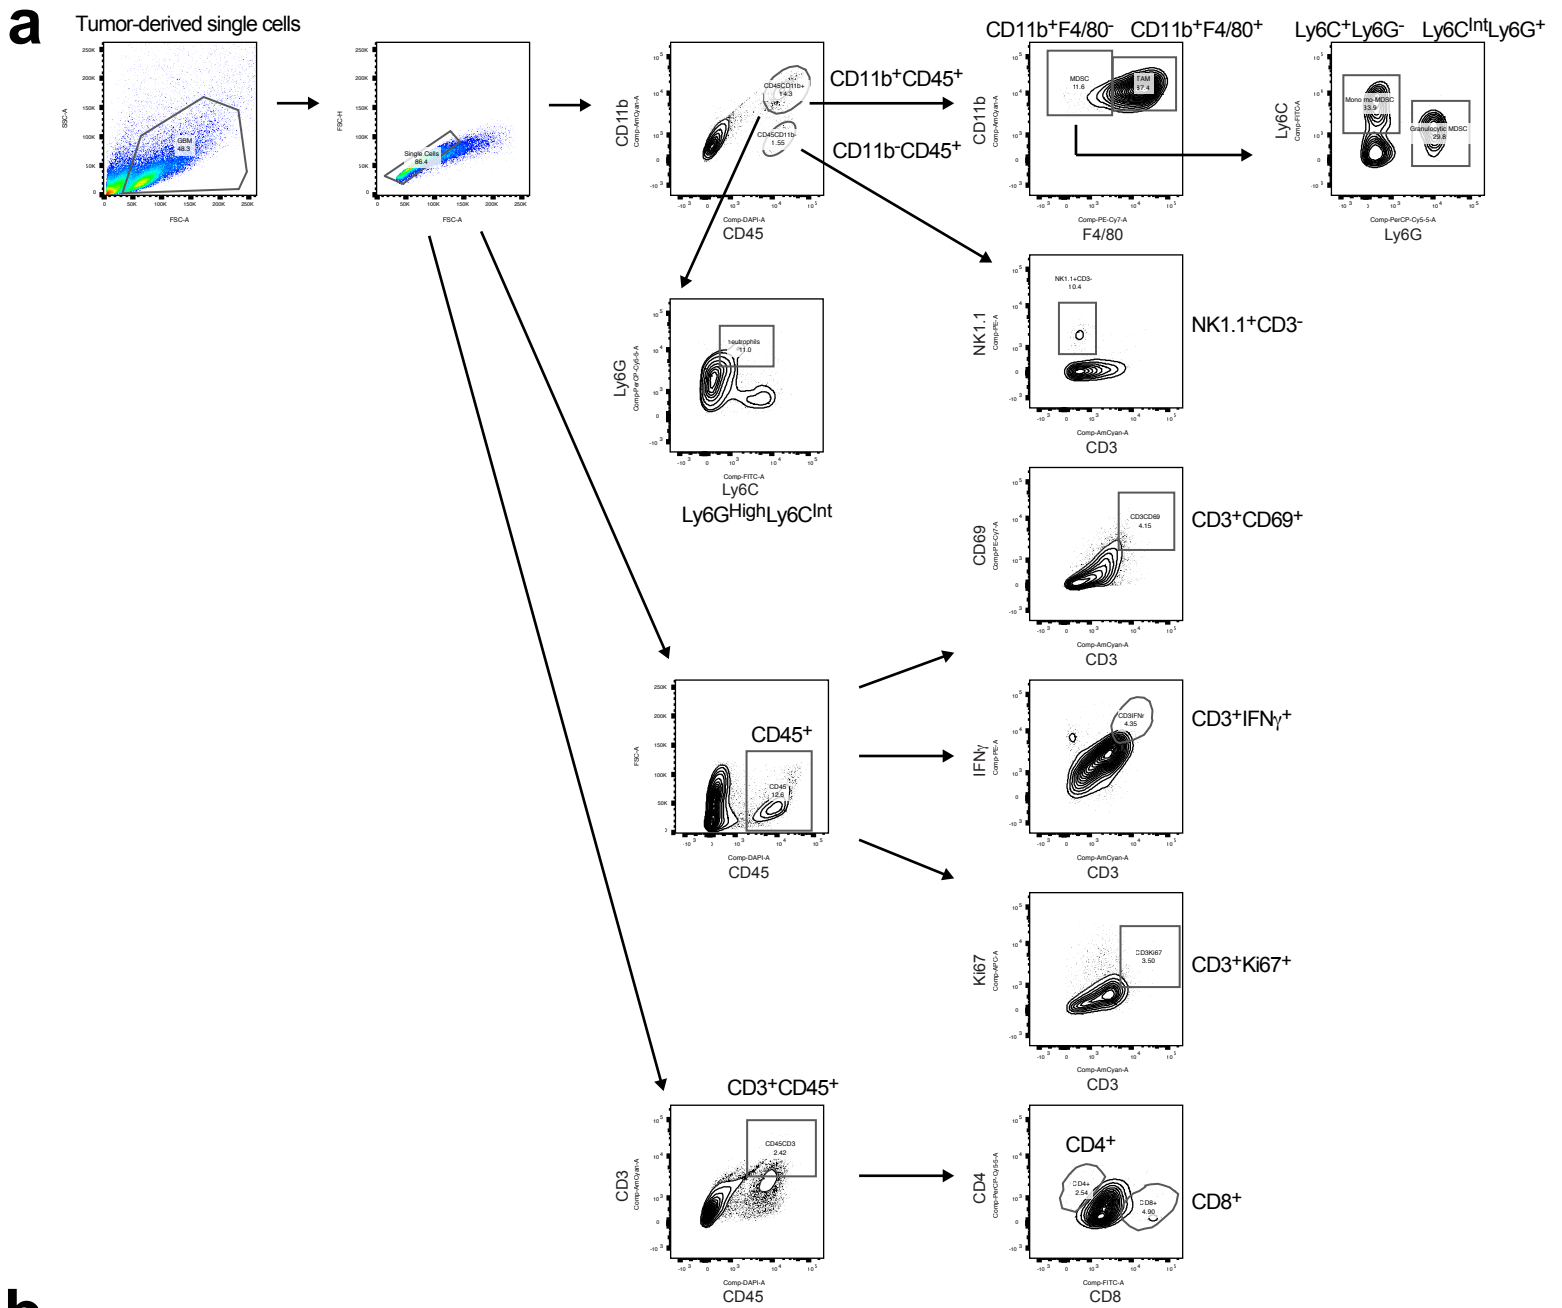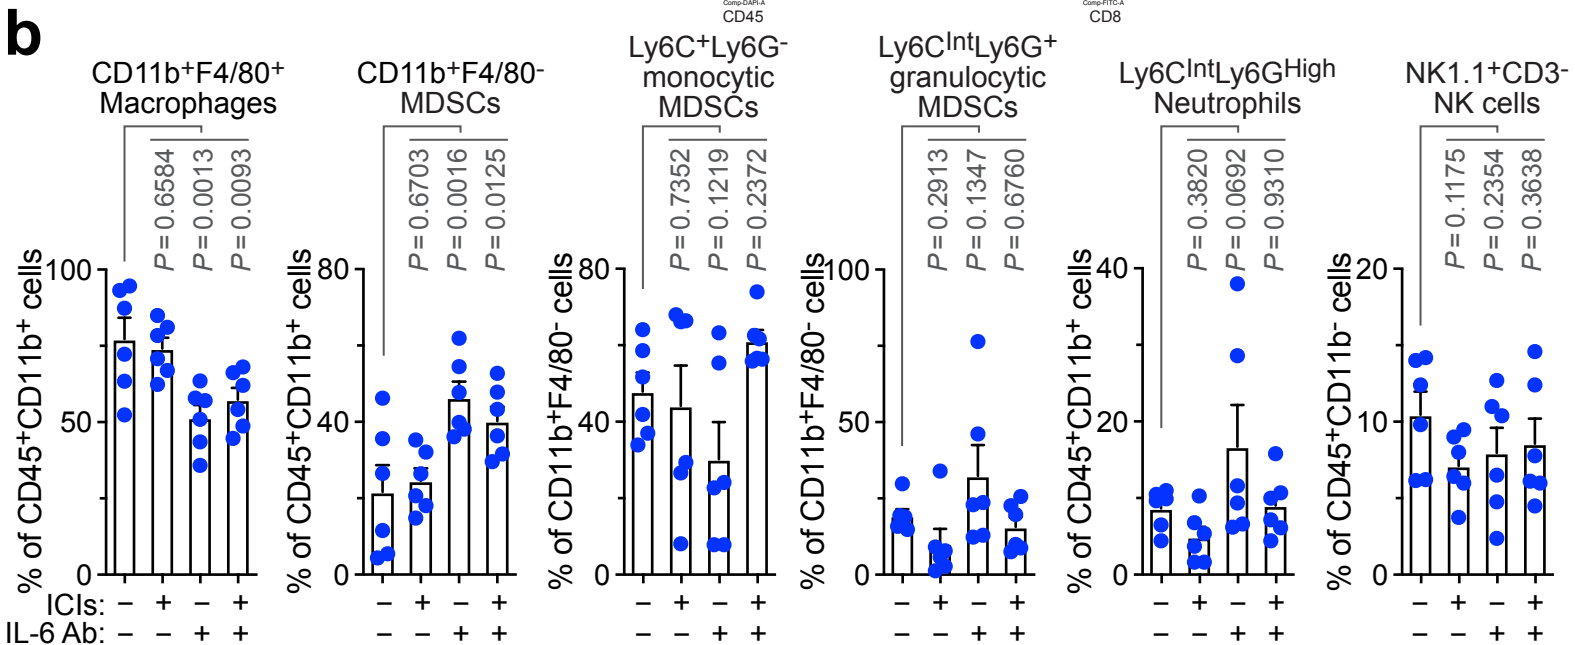

**Supplementary Fig. 2. Effects of IL-6 blockade and immune checkpoint inhibition on GBM immunity.**

GBM was induced in WT mice, followed by injection with control IgG, anti-IL-6 Ab, and/or immune checkpoint inhibition (ICIs). Tumors were excised 3 days after treatment. Tumor-derived single cell suspensions were analyzed by flow cytometry. **a**, Gating strategies used for the assays presented in this figure and Fig. 2d-g. **b**, Analysis for different immune cells (n = 6 mice, mean  $\pm$  SEM). Statistical analysis by one-way ANOVA with Fisher's LSD test. Source data are provided as a Source data file.

**a**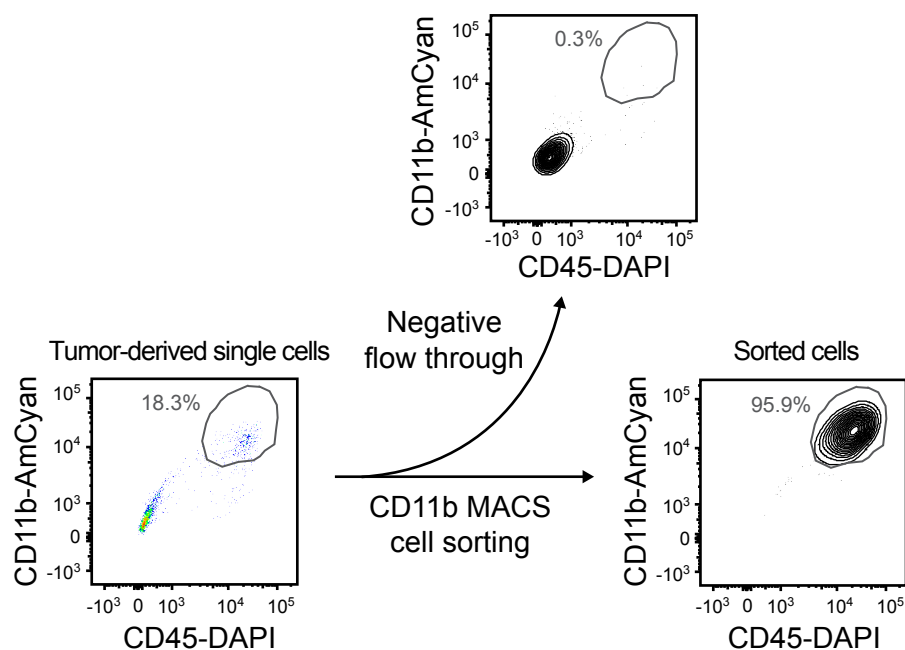**b**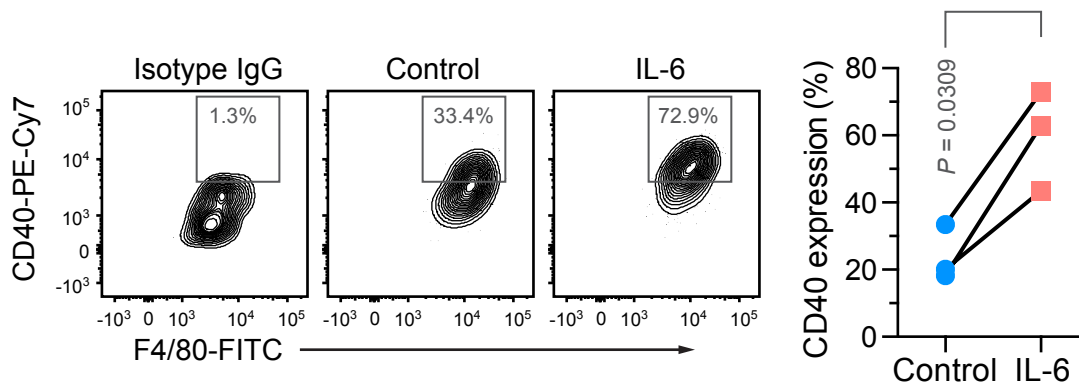**Supplementary Fig. 3. IL-6 stimulates CD40 expression in tumor-derived Mφs.**

GBM was genetically induced in WT mice. Tumor-derived single cell suspensions were sorted by magnetic activated cell sorting (MACS) with anti-CD11b-conjugated beads. **a**, Cells before and after MACS were analyzed by flow cytometry with anti-CD11b and anti-CD45 antibodies. Representative cell sortings are shown (n = 3 mice). **b**, Sorted CD11b<sup>+</sup> cells were treated with 50 ng/ml IL-6 for 2 days, followed by flow cytometry analysis. Left, representative cell sortings. Right, quantified results (n = 3 mice). Statistical analysis by two-tailed paired Student's *t* test. Source data are provided as a Source data file.

**a**

Genetically engineered tumor cells

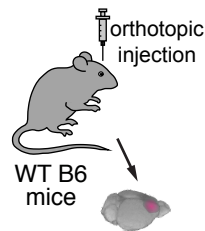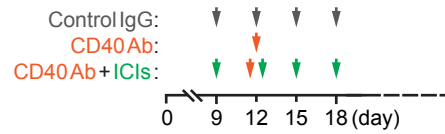**b**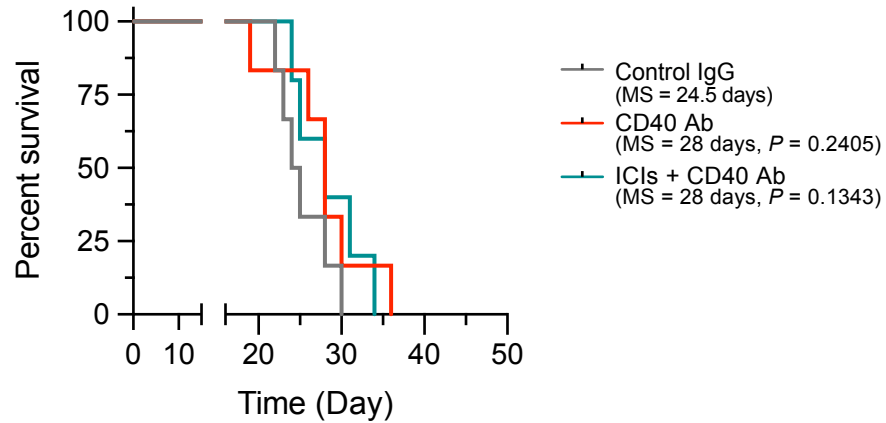**Supplementary Figure 4. Combination therapy with a CD40 agonist and checkpoint inhibitors does not extend animal survival in GBM-bearing mice.**

GBM was induced in mice, followed by different treatment and survival analyses ( $n = 6$  mice for control IgG group and CD40 Ab group, and  $n = 5$  mice for ICIs plus CD40 Ab group). (a) Experimental procedure. (b) Mouse survival was monitored and analyzed by Log-rank Mantel-cox analysis.

**a**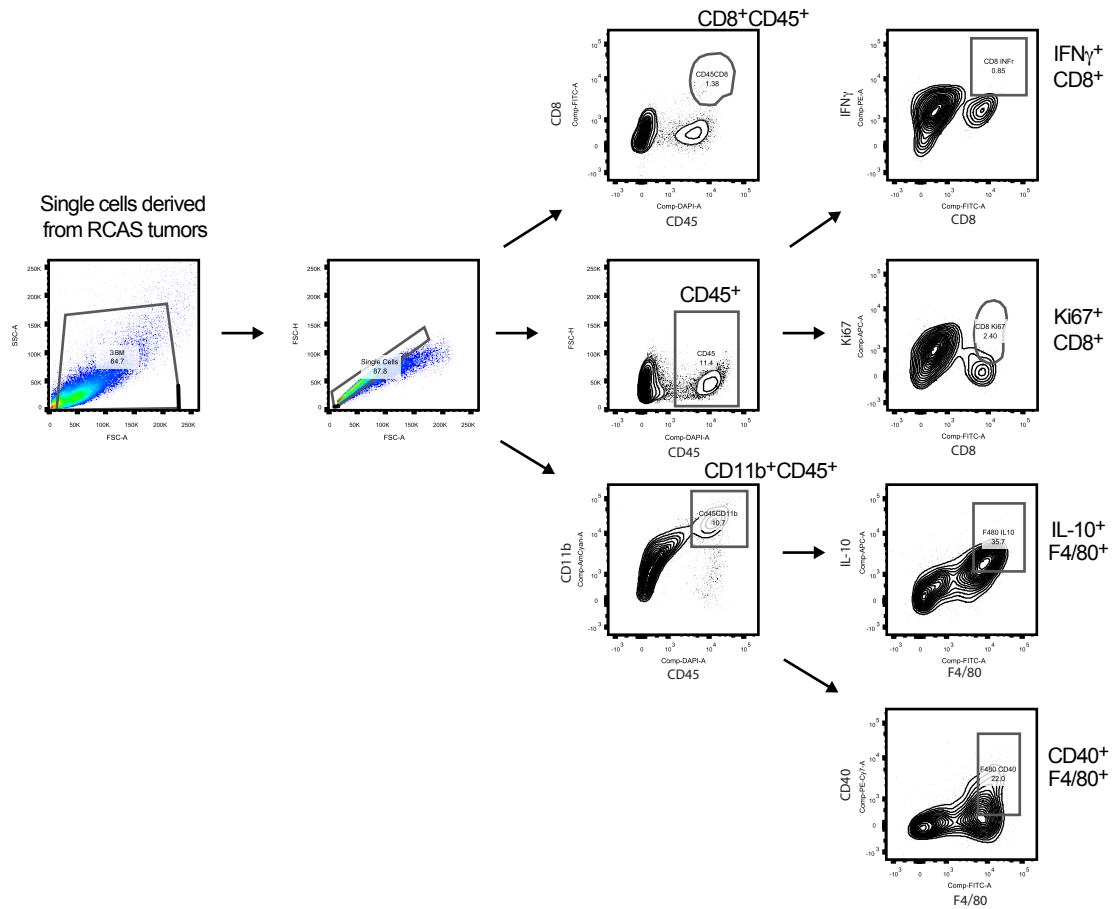**b**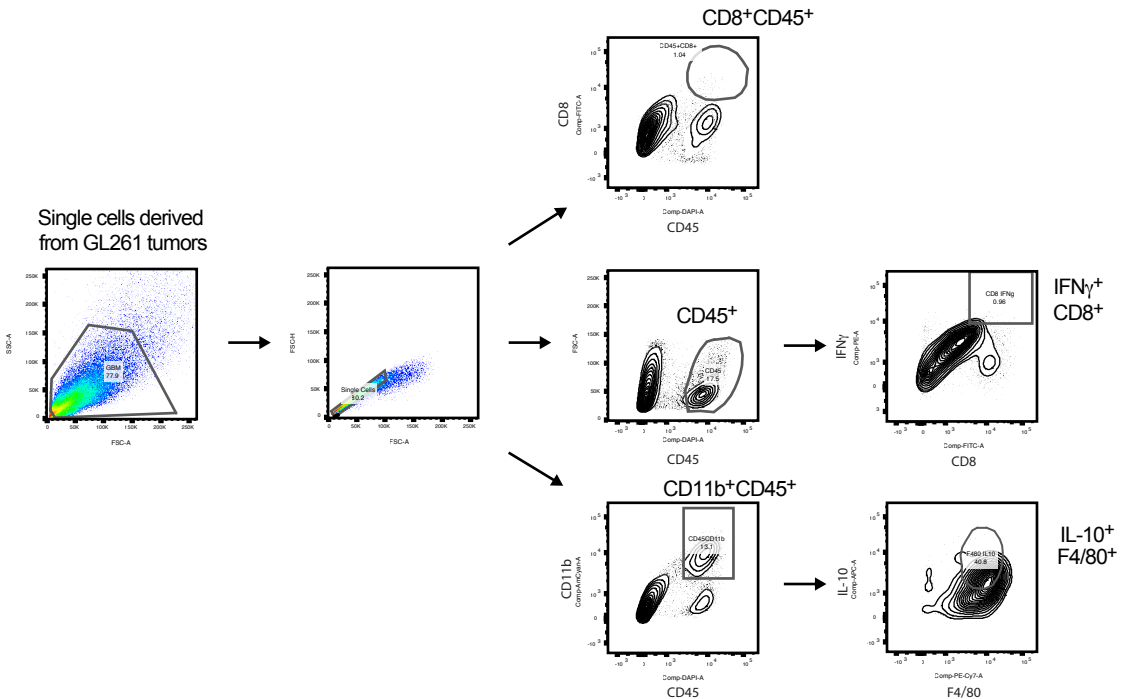

**Supplementary Fig. 5. Gating strategies for flow cytometry analysis of mouse GBM tumors treated with ICIs, IL-6 antibody, and CD40 antibody.**

GBM was induced in mice by injection with **a**, tumor cells derived from RCAS-mediated genetically engineered GBM model or with **b**, GL261 mouse glioma cells, followed by treatment with control antibody, ICIs, IL-6 antibody, and CD40 antibody. Tumor-derived single cells were stained with different antibodies and analyzed by flow cytometry. **a**, Gating strategies used for the assays presented in Fig. 3i,j and Fig. 6c-f. **b**, Gating strategies used for the assays presented in Supplementary Fig. 6b-d.

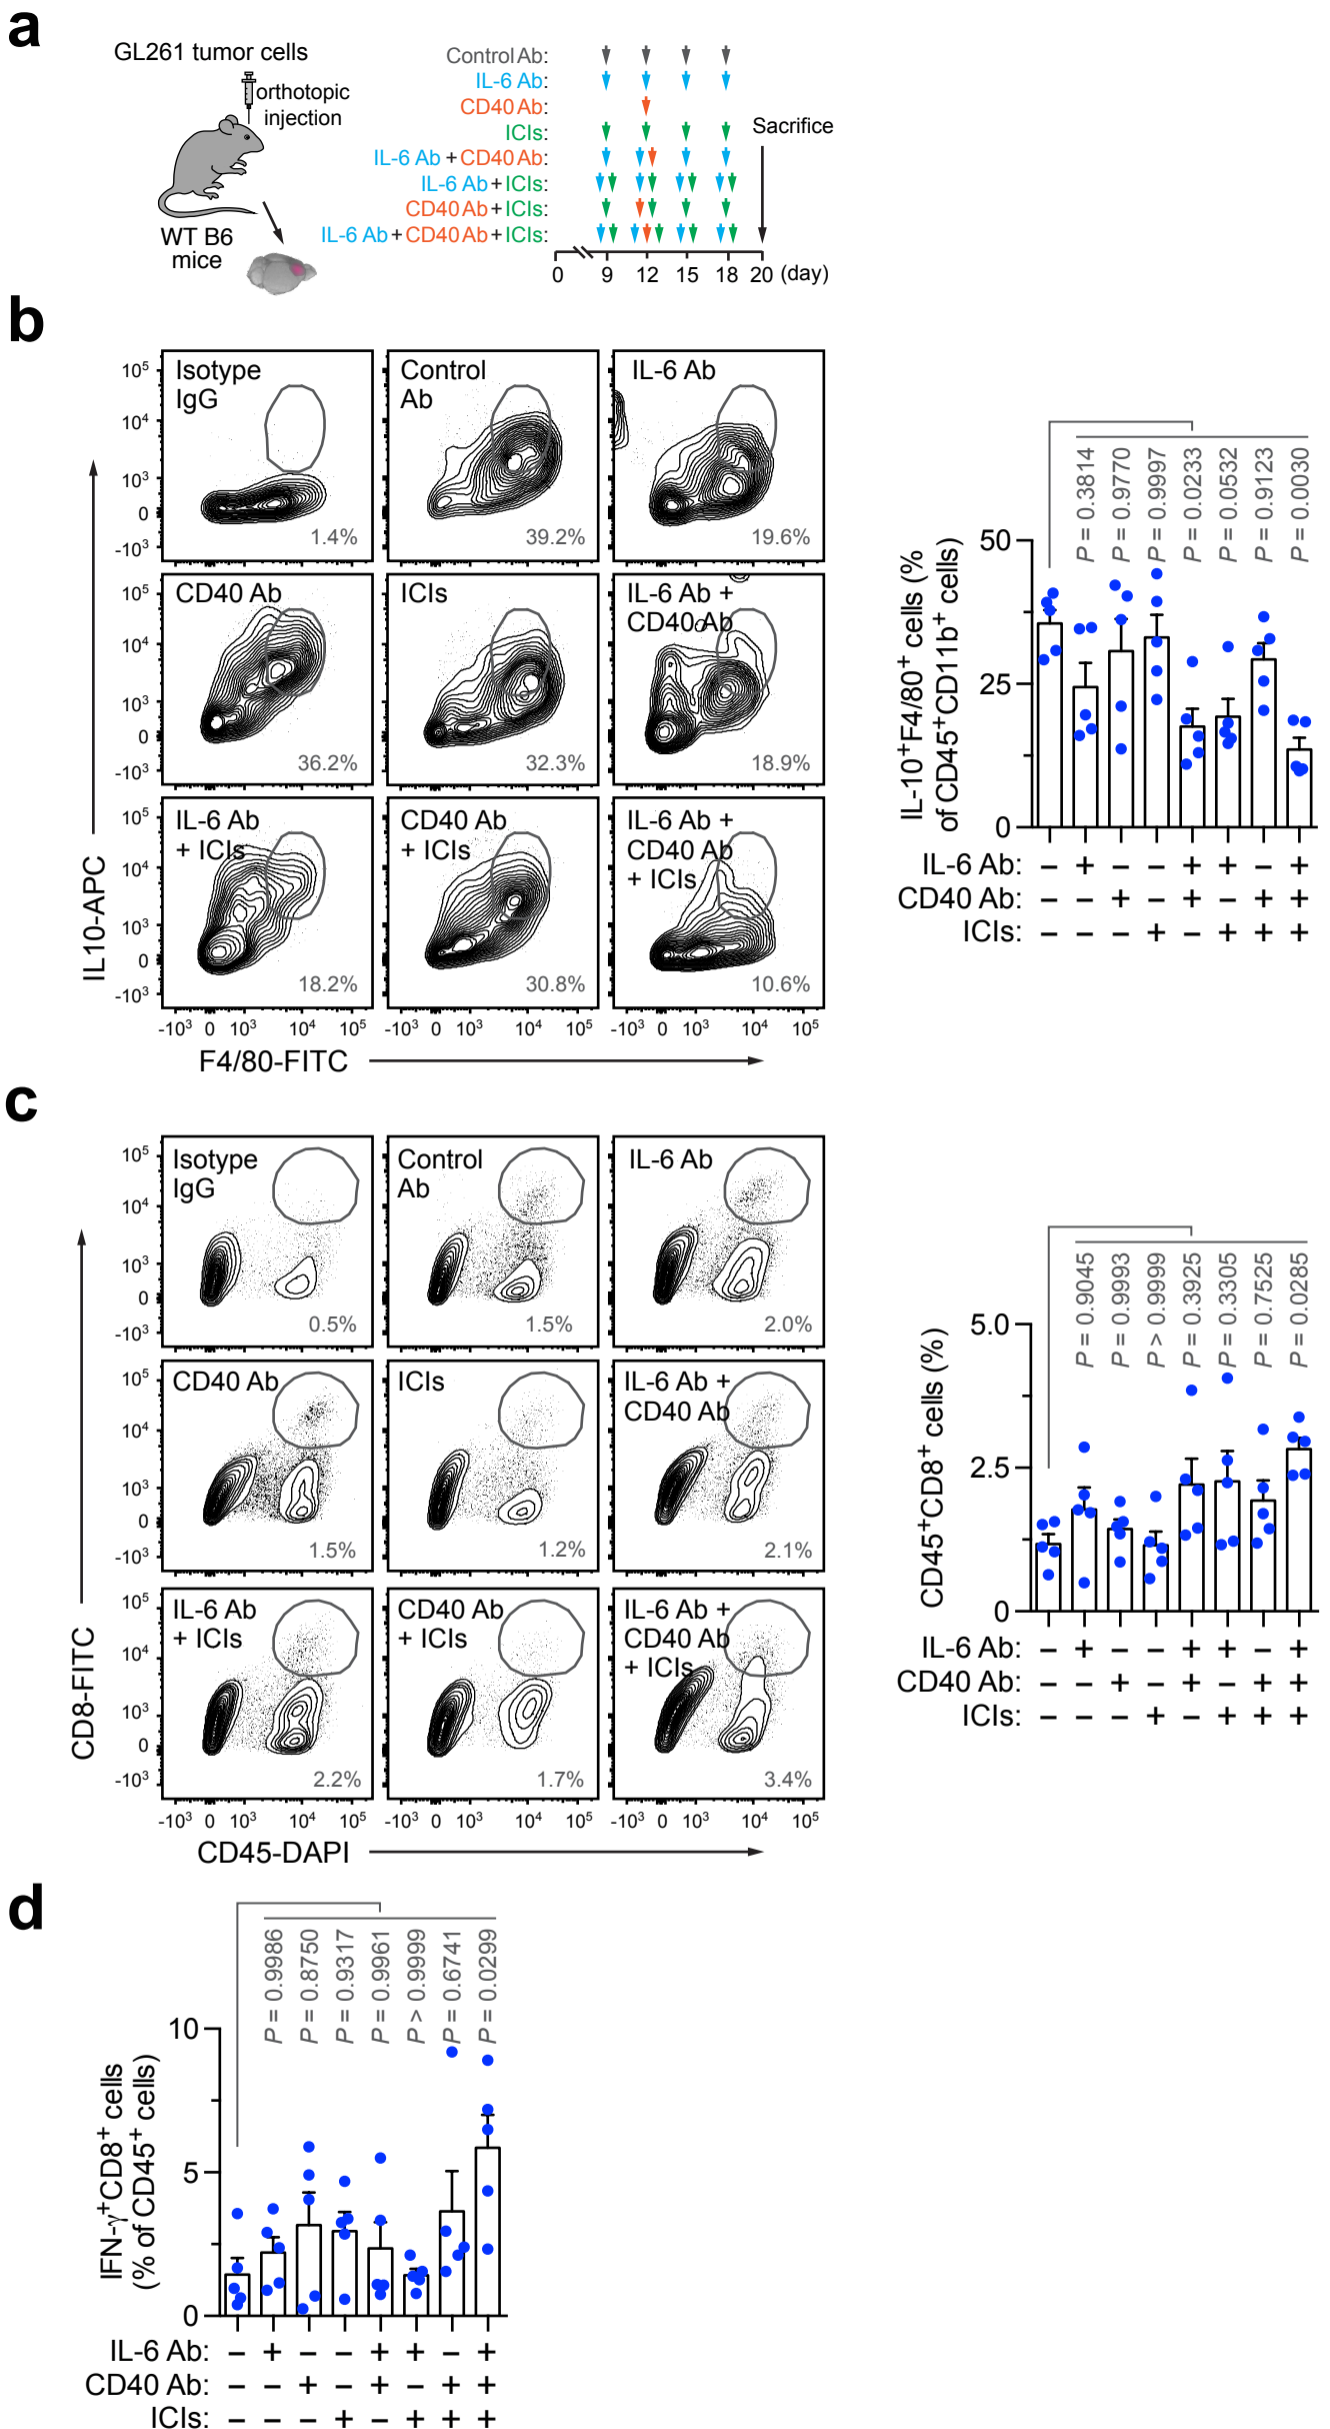

**Supplementary Fig. 6. IL-6 neutralization and CD40 stimulation plus immune checkpoint blockade synergistically reverses M $\phi$ -mediated immune suppression and activates tumor-associated T cells in GL261 GBM.**

GBM was induced in mice by injection with GL261 mouse glioma cells, followed by different treatment and end-point analyses. **a**, Experimental procedure. **b-e**, Tumor-derived single-cell suspensions were analyzed by flow cytometry. **b,c**, Cells were probed with **b**, anti-F4/80 and anti-IL10 or **c**, anti-CD45 and anti-CD8 antibodies. Left, representative sortings. Right, quantified results ( $n = 5$  mice, mean  $\pm$  SEM). Statistical analysis by one-way ANOVA with Turkey's test. **d**, Cells were probed with anti-CD8 and anti-IFN- $\gamma$  antibodies. Quantified results are shown ( $n = 5$  mice, mean  $\pm$  SEM). Statistical analysis by one-way ANOVA with Turkey's test. Source data are provided as a Source data file.

**a**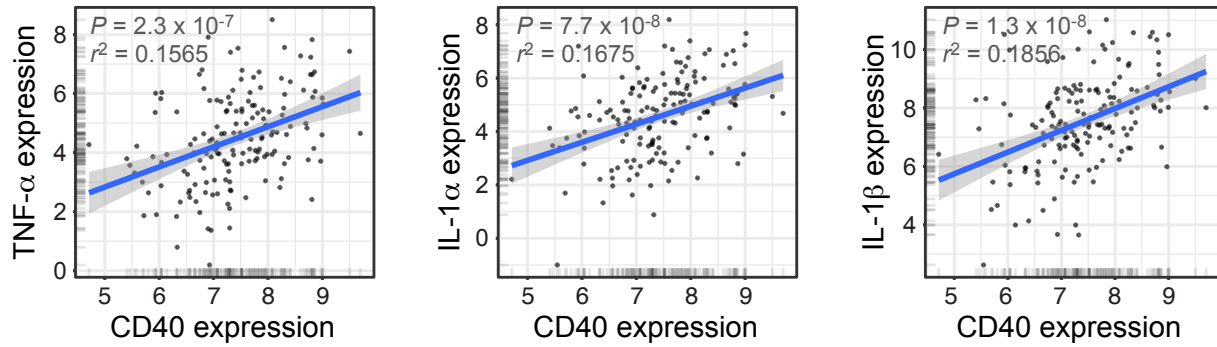**b**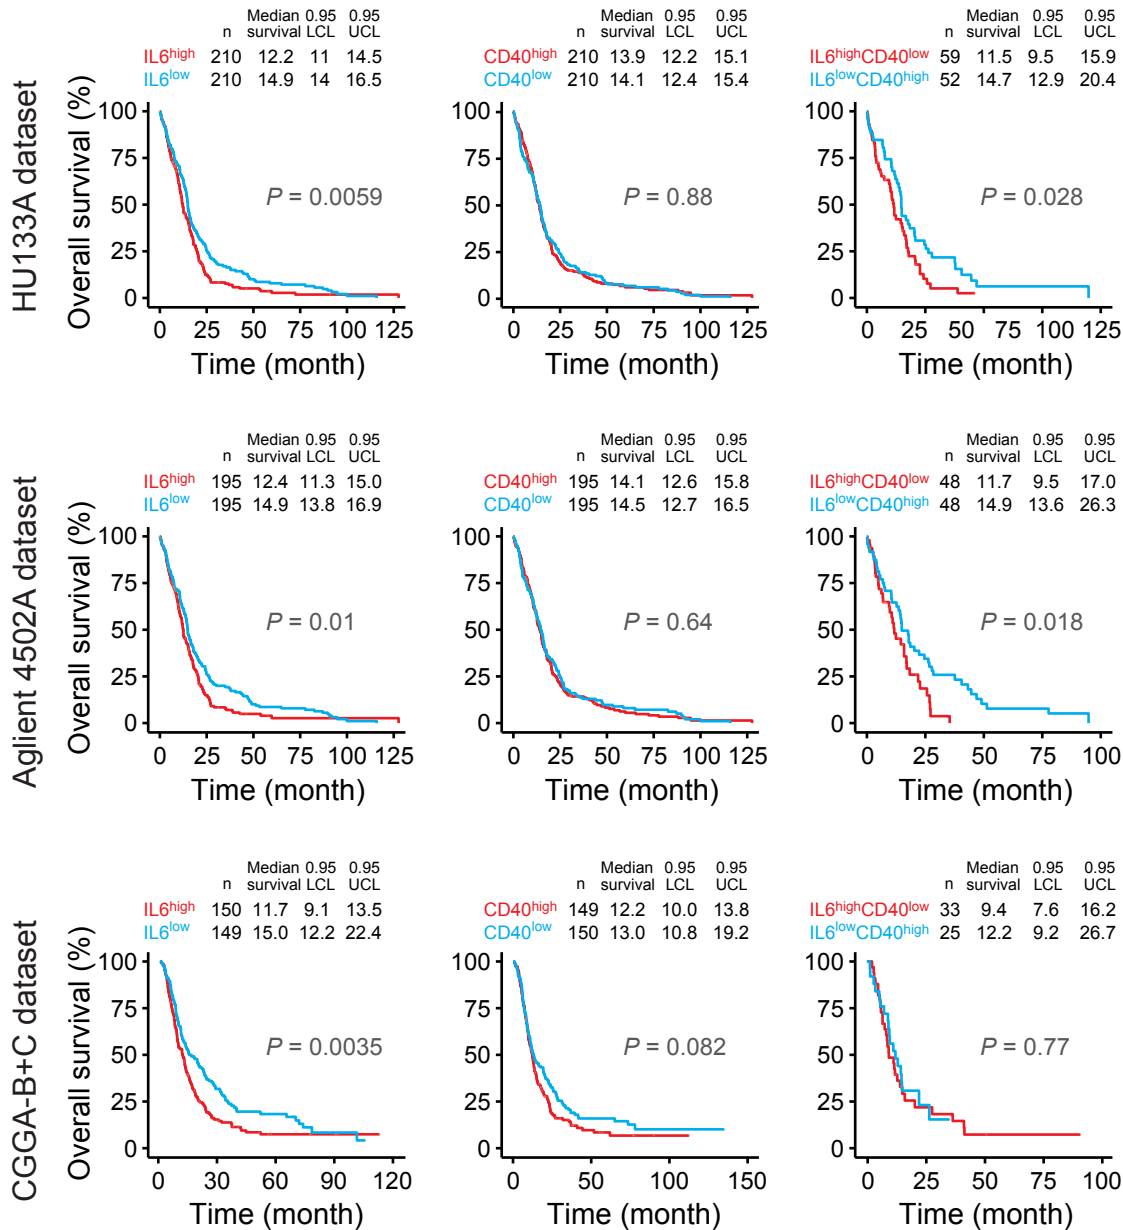

**Supplementary Fig. 7. High IL-6 expression and low CD40 expression correlate with poor survival in human GBM patients.**

**a**, Correlation of CD40 expression with TNF- $\alpha$ , IL-1 $\alpha$ , and IL-1 $\beta$  was subjected to linear regression analyses using Gliovis/TCGA GBM-RNAseq dataset (n = 160 patients). Statistical analysis by linear regression analysis. **b**, Correlation of IL6 and CD40 expression (high/low cutoff of 40%) with overall survival was analyzed using Gliovis datasets. Statistical analysis by two-sided Log-rank test.
